# Supplementary material for: The Genome of the Endangered Dryas Monkey Provides New Insights into the Evolutionary History of the Vervets
Source: PubMed Central journal article supplement — Mol Biol Evol. 2019 Sep 16;37(1):183–94. doi: 10.1093/molbev/msz213 (PMC6984364; doi:10.1093/molbev/msz213), 2019-09-16
Supplement: msz213_supplementary_data.pdf [file msz213_supplementary_data.pdf]

# Supplementary figures

## The genome of the endangered Dryas monkey provides new insights into the evolutionary history of the vervets

T. van der Valk, C. M. Gonda, H. Silegowa, S. Almanza, I. Sifuentes-Romero, T. Hart, J. Hart, K. Detwiler, K. Guschanski

**Corresponding authors:** Tom van der Valk, [tom.vandervalk@ebc.uu.se](mailto:tom.vandervalk@ebc.uu.se), Katerina Guschanski [katerina.guschanski@ebc.uu.se](mailto:katerina.guschanski@ebc.uu.se)

| <b>Content</b> | <b>Page</b> |
|----------------|-------------|
| Table S1       | 2           |
| Table S2       | 2           |
| Figure S1      | 3           |
| Figure S2      | 4           |
| Figure S3      | 5           |
| Figure S4      | 6           |
| Figure S5      | 7           |
| Figure S6      | 8           |
| Figure S7      | 9           |
| Figure S8      | 10          |
| Figure S9      | 11          |
| Figure S10     | 12          |
| Figure S11     | 13          |
| Figure S12     | 14          |

**Table S1.** Sample information.

| Date collected | Field ID | Species                    | Location                          | GPS (decimal degrees) | Sex | Age       | Country of Origin | Collector   | FAU Primatology Lab ID | Yale Peabody Museum catalog number |
|----------------|----------|----------------------------|-----------------------------------|-----------------------|-----|-----------|-------------------|-------------|------------------------|------------------------------------|
| 06-Aug-14      | JH023    | <i>Cercopithecus dryas</i> | Bafundo Forest                    | S02.08911, E025.57543 | M   | Adult     | DRC               | John Hart   | DRD14M417              | YPM MAM 016890                     |
| 26-Oct-14      | JH024    | <i>Cercopithecus dryas</i> | Bafundo Forest, west Kasuku River | S02.08920, E025.57500 | M   | Adult     | DRC               | John Hart   | DRD14M418              | -                                  |
| 20-Dec-17      | NA       | <i>Cercopithecus dryas</i> | Camp Ilumbe, Bafundo Forest       | S02.06203, E025.58421 | F   | Sub-adult | DRC               | Pablo Ayali | DRD17F400              | YPM MAM 017066                     |

**Table S2.** Primer sequences and annealing temperatures used for cytochrome B sequencing.

| Primer Name             | Sequence (5' – 3')         | Size [bp] | T <sub>a</sub> [°C] |
|-------------------------|----------------------------|-----------|---------------------|
| 5 overlapping Fragments |                            |           |                     |
| cytbA1fw                | CCACCGTTGTA CTTCAACTAC     | 369       | 62                  |
| cytbA1rv                | CAGGTTTTTAGGAGAAGGAATG     |           |                     |
| cytbA2fw                | GGCGCCTCCATATTTTTTCATC     | 334       | 62                  |
| cytbA2rv                | TTGTCTGAGTCTGATGAGATTC     |           |                     |
| cytbB1fw                | CCACCCTTTCACGATTCTTCA      | 382       | 64                  |
| cytbB1rv                | ATGAGGATTGATTGATAGGAAGAGTG |           |                     |
| cytbB2fw                | CCCTCCACACATCAAACCAG       | 390       | 62                  |
| cytbB2rv                | TAGTTTACAAGACTAGTGTATTAG   |           |                     |
| cytbB2fw4               | YCCACACATCAAACCAG          | 322       | 60                  |
| cytbB2rv4               | TAGAATGCCAGTTTTGGG         |           |                     |



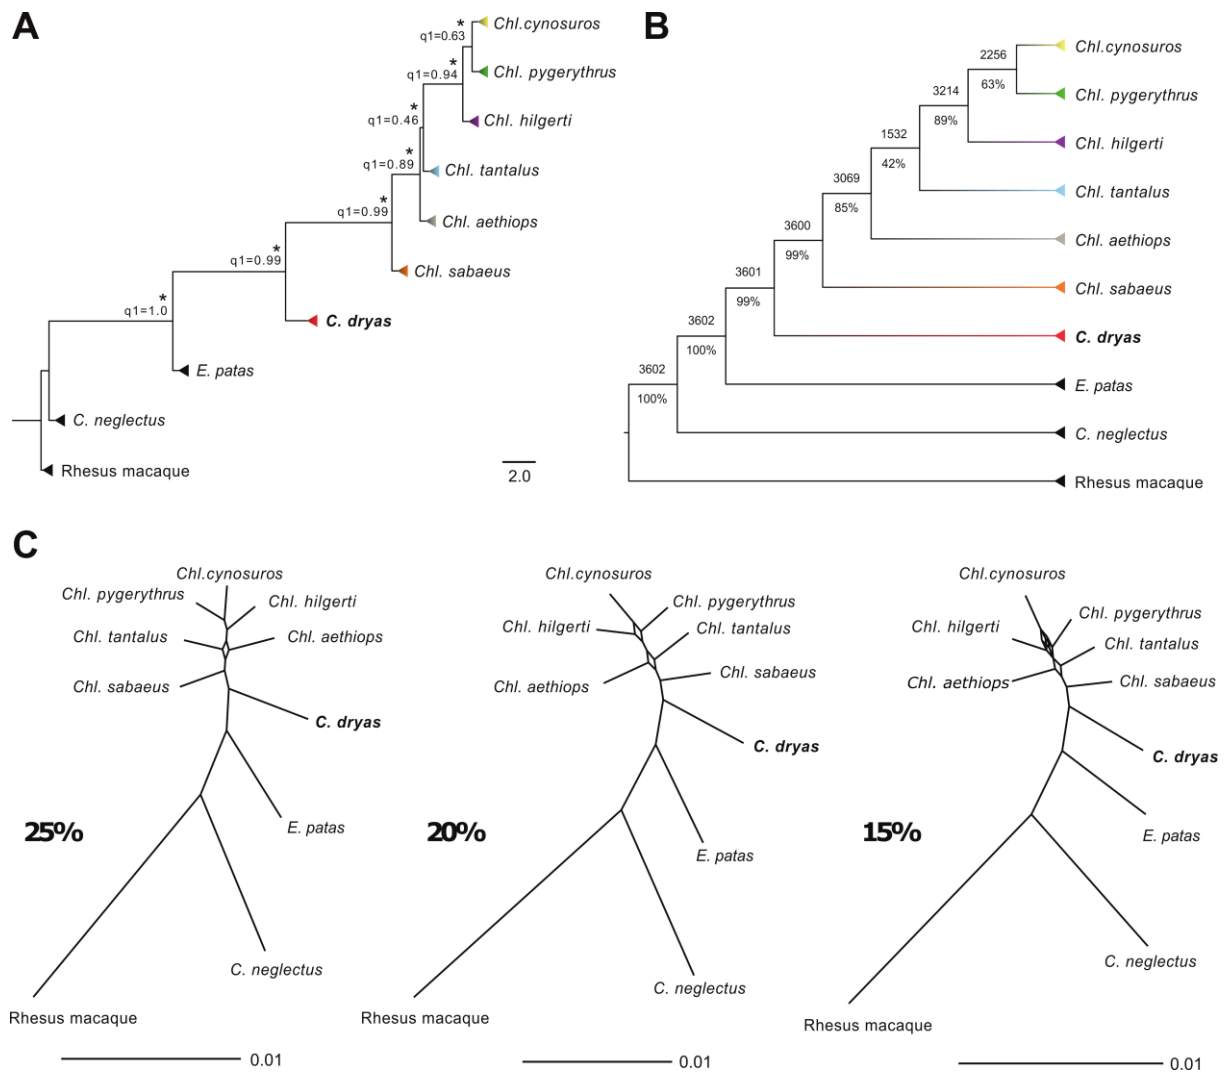

**Figure S2. Phylogeny of the Dryas monkey and the vervets. (A)** MSC-based species trees generated by ASTRAL using 3602 autosomal genomic windows. The tree was rooted with the rhesus macaque. Branch lengths are given in coalescent units and are an indicator of gene-tree discordance. The normalized quartet score of this topology is 0.87. Asterisk symbols at nodes indicate maximum local quartet support posterior probabilities ( $l_{pp}=1.0$ ) and  $q1$  values displayed at each node show the percentage of quartets in all gene trees that agree with that branch topology. **(B)** Majority-rule consensus tree obtained from 3602 autosomal gene-trees using CONSENSE in PHYLIP v3.695. The number above each branch shows the total number of trees out of all 3602 gene trees supporting the given branch and the number below corresponds to its percentage. **(C)** SplitsTree consensus networks using 3602 gene trees at median thresholds of 25%, 20% and 15%.

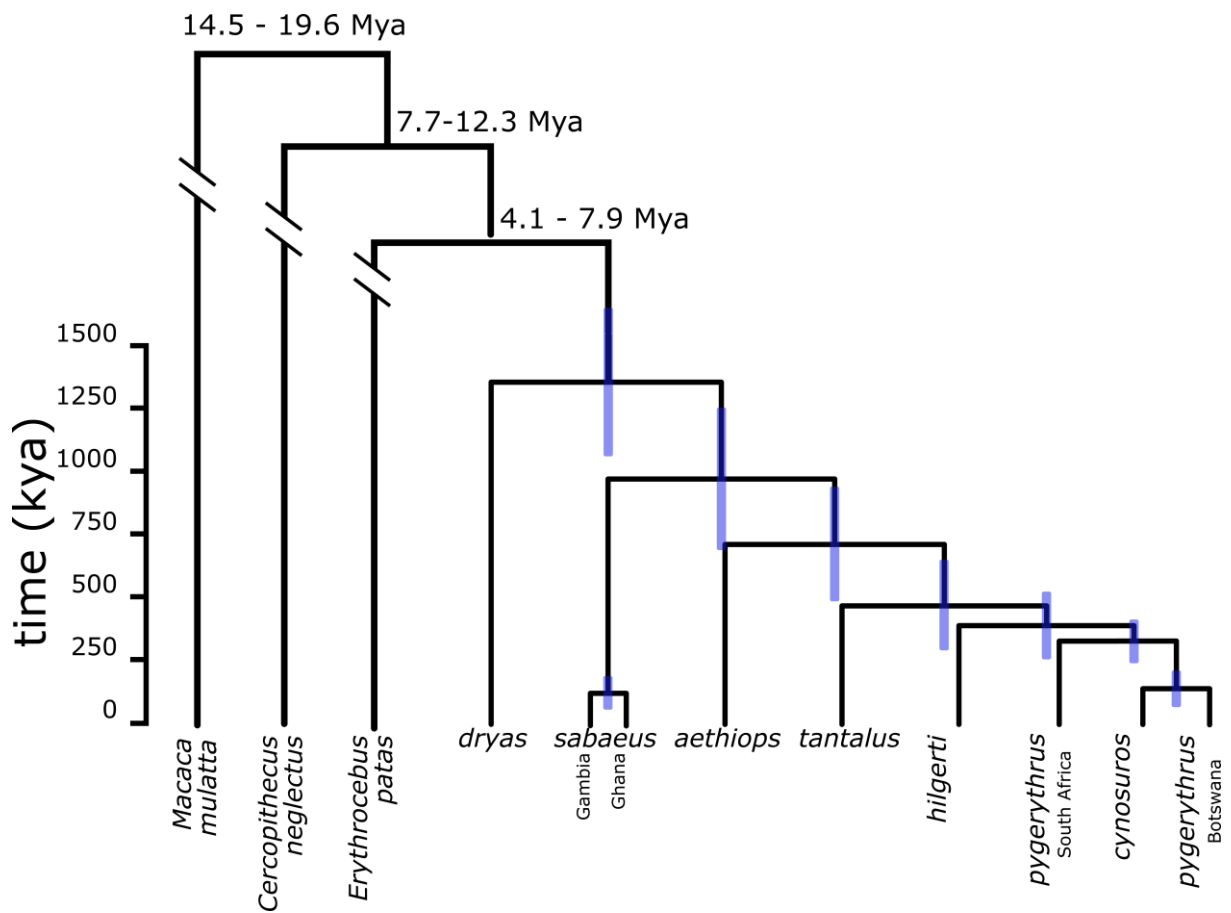

**Figure S3. The autosomal consensus phylogeny and MCMC dating.** Same as figure 1B but depicting 95% confidence intervals for the estimated divergence times. Confidence intervals for the oldest nodes are depicted with numbers for clarity.

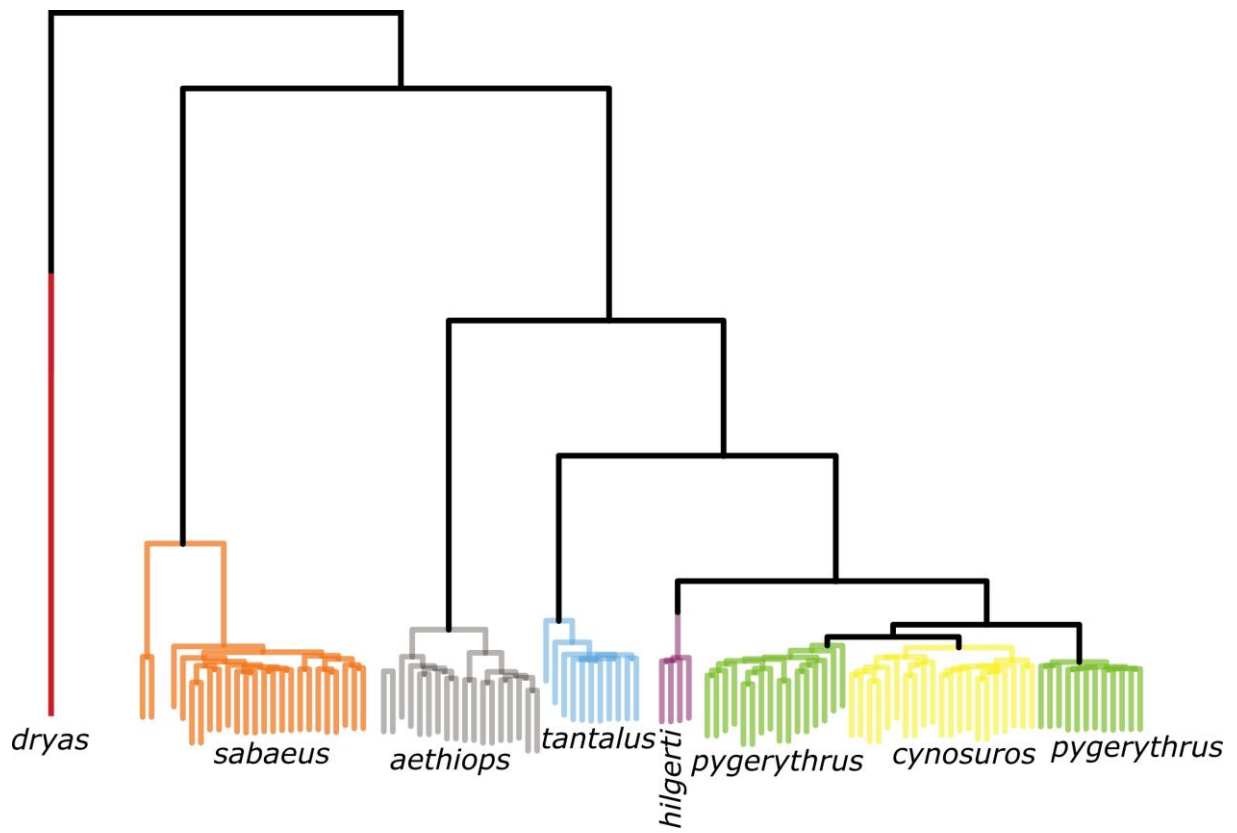

**Figure S4. Evolutionary relationships of the Dryas monkey and the vervets.** The tree shows the UPGMA clustering of all individuals used in this study based on all bi-allelic autosomal sites.

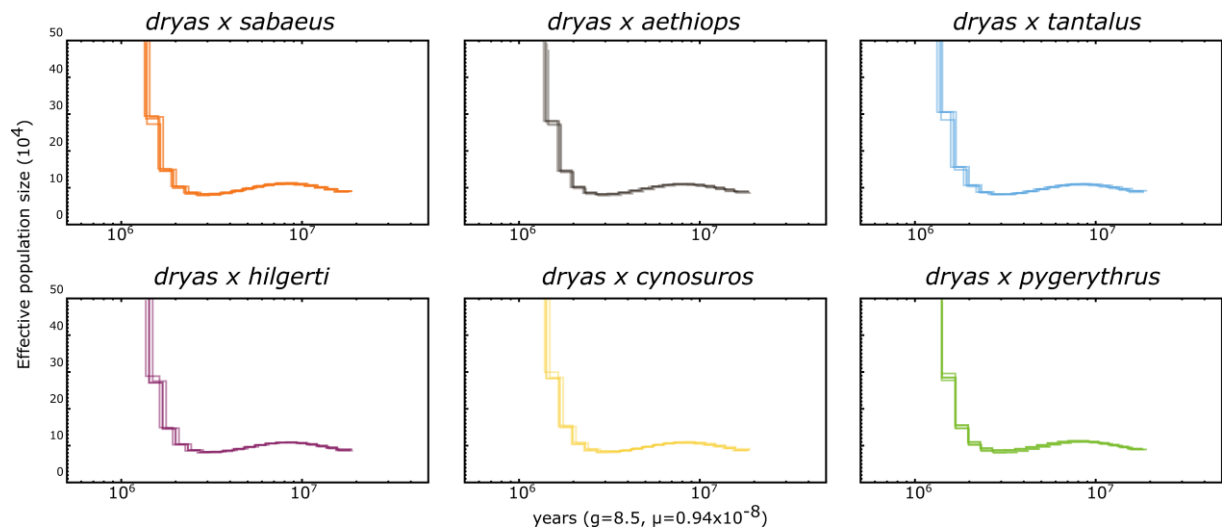

**Figure S5. Artificial hybrid PSMC (hPSMC) of the Dryas monkey and the vervets.** hPSMC was run on pairwise haploidized genomes for the Dryas monkey and four individuals from each vervet species assuming a generation time of 8.5 years and a mutation rate per generation of  $0.94 \times 10^{-8}$ . PSMC plots on artificial hybrid genomes (hPSMC) show a rapid increase in effective population size at the time when the two parental lineages diverged. A stepwise increase in  $N_e$  is an indication of a population split with ongoing gene-flow. Note that the rapid increase in effective population size occurs at the same time for each combination of Dryas monkey and vervet species, suggesting that the Dryas monkey is equidistant to each of them.

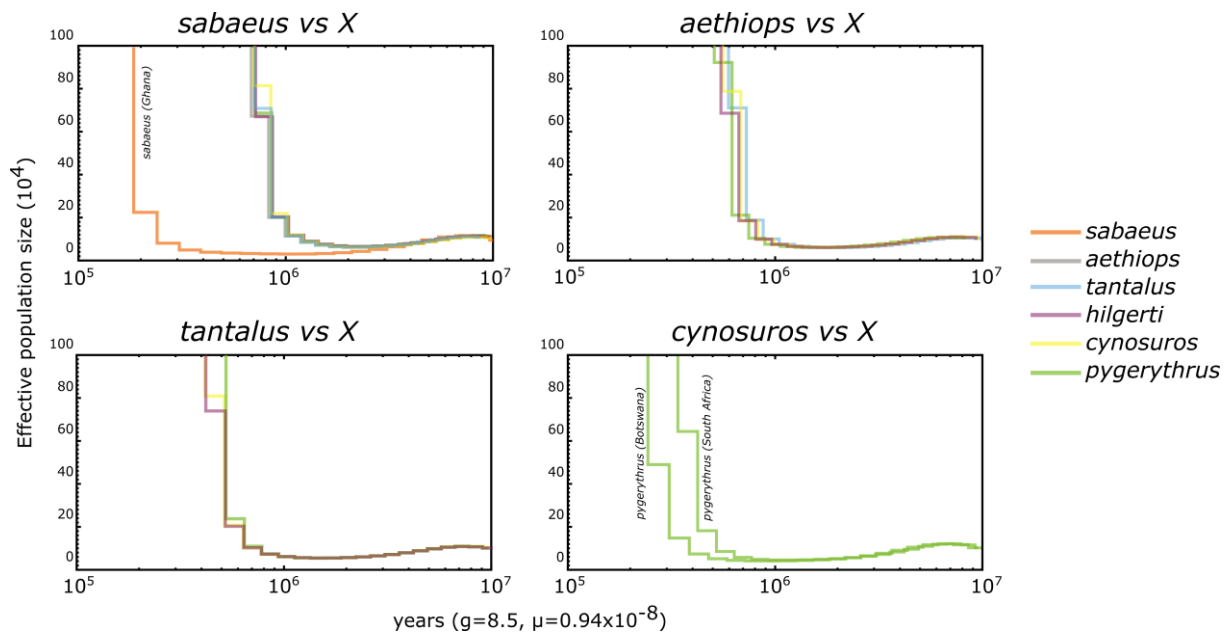

**Figure S6. Artificial hybrid PSMC (hPSMC) within the vervet clade.** Same as Figure S4, estimating divergence-times within the vervet genus.



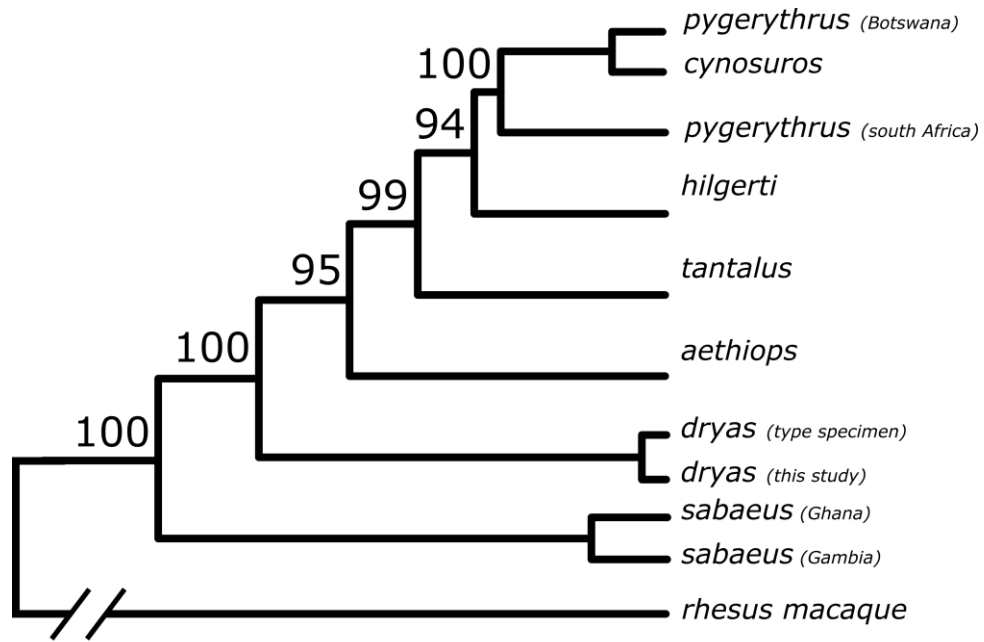

**Figure S7. Maximum likelihood tree based on complete mitochondrial genomes for the vervets and the Dryas monkey (same as Figure 1C).** Numbers depict bootstrap support values (1000 bootstrap replicates were run).

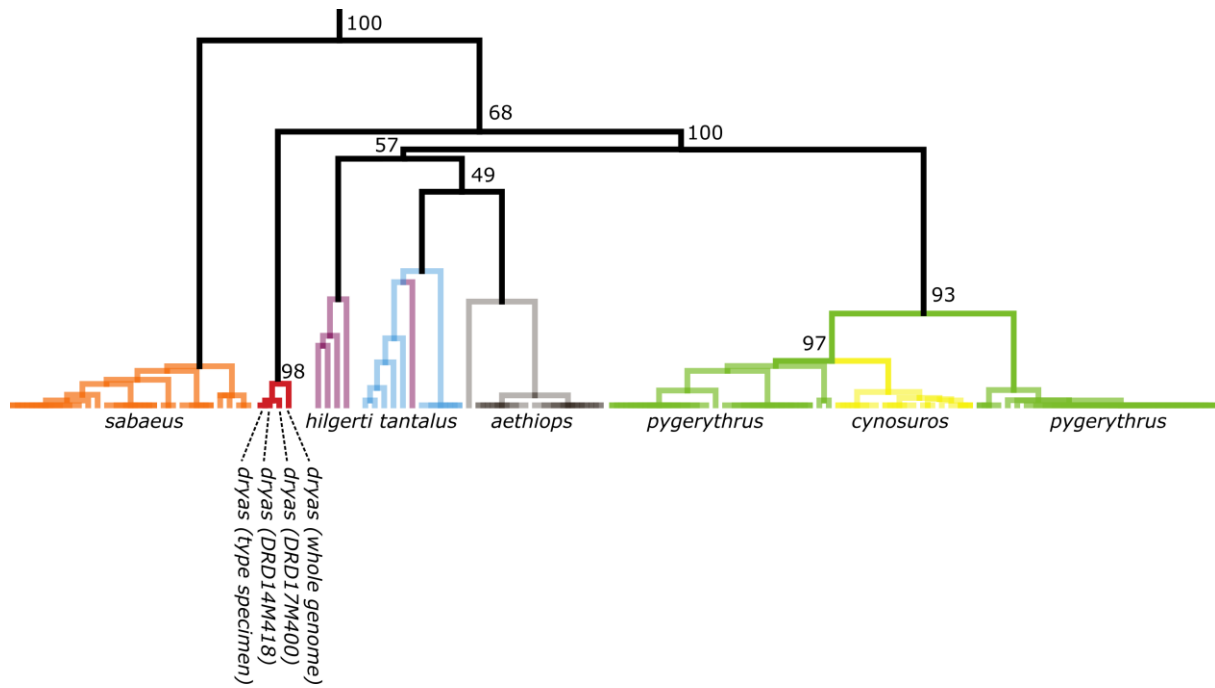

**Figure S8. Maximum likelihood tree based on the cytochrome B sequence for the vervets and the Dryas monkey.** Numbers depict bootstrap support values (1000 bootstrap replicates were run). Note the close clustering of all available Dryas monkey cytochrome B sequences.

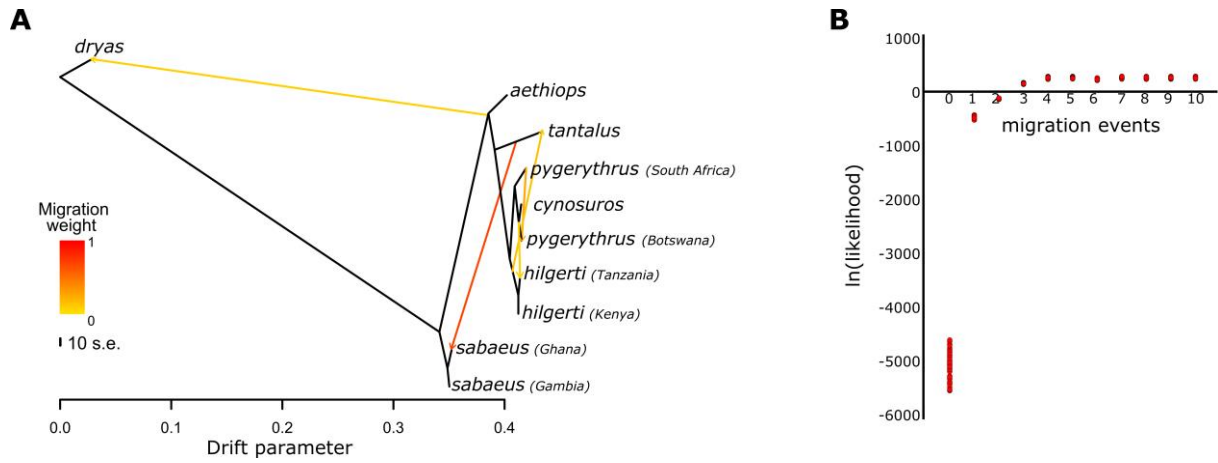

**Figure S9. Model-based estimates of gene-flow. (A)** TreeMix analysis for five migration events ( $m=5$ ). Population allele frequencies are separated by species and geographic origin. **(B)** Likelihood support values for TreeMix models with 0 to 10 migration events respectively. After modelling five migration events, the model likelihood does not increase any further.

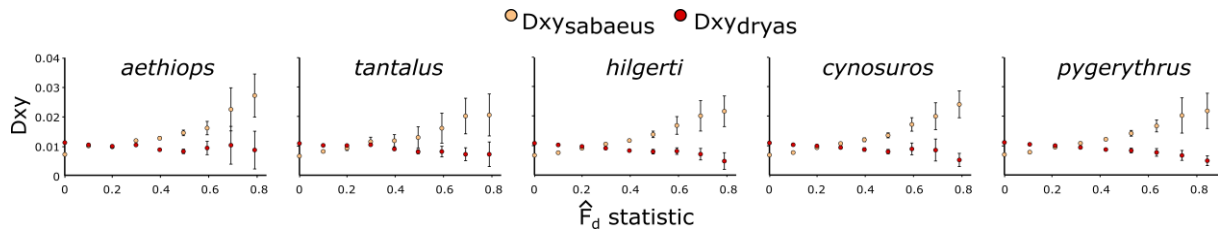

**Figure S10. Identifying introgressed regions with  $D_{xy}$  statistic stratified by  $\hat{F}_d$ .** Errors bars show  $\pm 3SE$ . Window size = 10kb. Windows with high  $\hat{F}_d$  statistic (the excess of shared derived alleles with the Dryas monkey over that with *Chl. sabaeus*) have on average unusual large genetic distance ( $D_{xy}$ ) to *Chl. sabaeus* and unusual low genetic distance to the Dryas monkey. Note that the vast majority of windows is at  $\hat{F}_d \sim 0$  (>90%).  $D_{xy-sabaeus}$  at windows with  $\hat{F}_d = 0$  (putative non-introgressed windows) is generally around 0.007, whereas  $D_{xy-dryas}$  at these windows  $\sim 0.012$ . This is in agreement with the obtained divergence time estimates (Figure 1B) (e.g. genetic distance of the non-*sabaeus* vervets to the Dryas monkey is on average 1.75 - 2.25 times larger than to *Chl. sabaeus*). At high  $\hat{F}_d$ ,  $D_{xy-dryas}$  is around  $\frac{1}{2}$ - $\frac{1}{3}$  that of  $\hat{F}_d = 0$ , suggesting that these windows diverged on average half to one third as long ago as the other windows (thus  $\sim 750.000$  to  $430.000$  years ago as the most likely time period of introgression, if we assume the divergence of the Dryas monkey to the vervets to be  $\sim 1.4$  Mya, as indicated by our analyses).

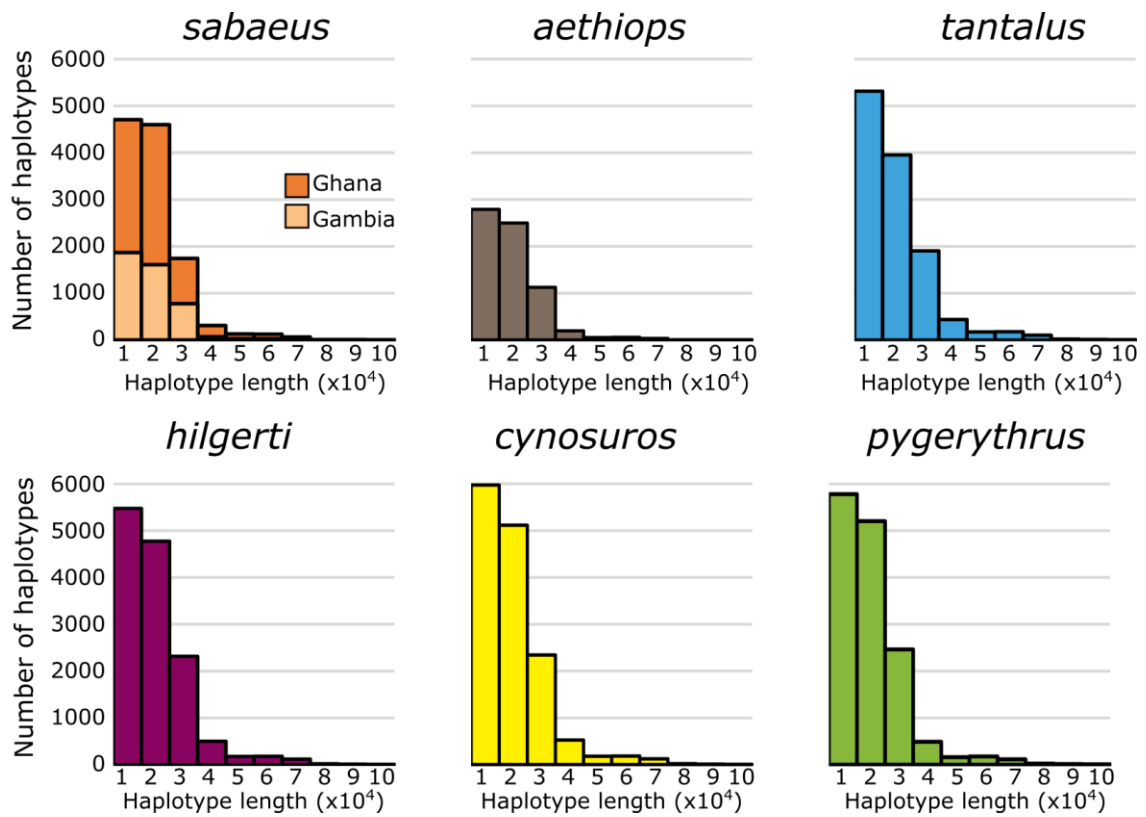

**Figure S11. Length distribution of putatively introgressed haplotypes.** Windows are short on average for all species. *Chl. sabaesus* individuals from Gambia have the lowest number of putatively introgressed windows, which were likely introduced into this species via secondary gene-flow with *Chl. tantalus*. Ghana individuals have a much higher number of these windows, as a result of the recent strong secondary admixture with *Chl. tantalus*.

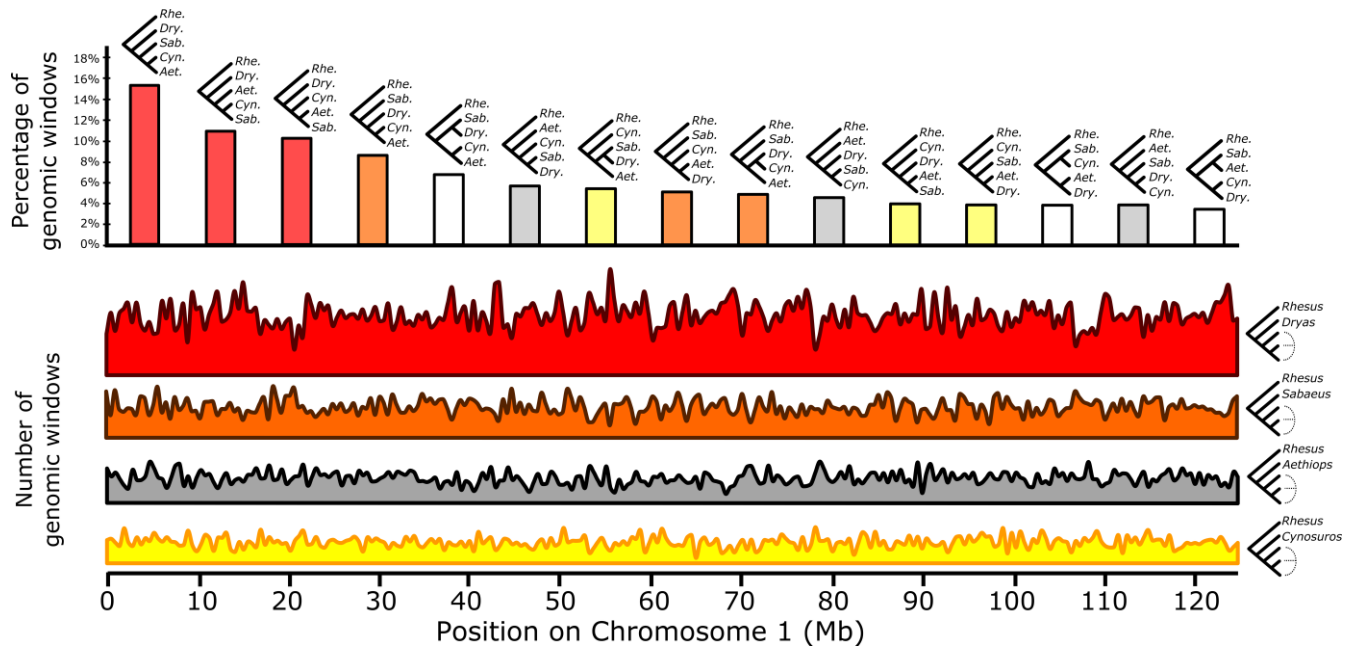

**Figure S12. Exploring evolutionary relationships across the genome using topology weighting (*Twisst*).** The top graph shows how often a depicted topology is supported among all non-overlapping 50 SNP windows (Rhe. = *Rhesus macaque*, Dry. = *Dryas monkey*, Sab. = *Chl. sabaesus*, Cyn. = *Chl. cynosuros*, Aet. = *Chl. aethiops*). The vast majority of windows supports the global topology (red-bars), in which the *Dryas monkey* is sister to all *vervets*. A smaller fraction of windows supports different topologies, likely to be the result of introgression and incomplete lineage sorting. Note that the second-most supported topology places the *Dryas monkey* inside the *vervet* clade with *Chl. sabaesus* as sister to all (orange bars). Plotting the occurrence of the different topologies along the genome (below), we did not identify long genomic regions supporting a contrasting topology to the majority topology (only chromosome 1 is shown here).
